# Supplementary material for: Hydrazide functionalized monodispersed silica microspheres: a novel probe with tunable selectivity for a versatile enrichment of phosphopeptides with different numbers of phosphorylation sites in MS analysis
Source: Royal Society of Chemistry journal article supplement (doi:10.1039/c5cc07941a), 2015-11-11
Supplement: c5cc07941a1.pdf [file c5cc07941a1.pdf]

## Supporting Information

### **Hydrazone functionalized monodispersed silica microsphere: a novel probe with tunable selectivity for versatile enrichment of phosphopeptides with different numbers of phosphorylation sites**

Linnan Xu<sup>1</sup>, Wen Ma<sup>1</sup>, Sensen Shen<sup>1</sup>, Liping Li<sup>2</sup>, Yu Bai<sup>1\*</sup> and Huwei Liu<sup>1</sup>

*1 Beijing National Laboratory for Molecular Sciences, Key Laboratory of Bioorganic Chemistry and Molecular Engineering of Ministry of Education, College of Chemistry and Molecular Engineering, Peking University, Beijing 100871, China. Tel: +86 10 6275 8198; E-mail: yu.bai@pku.edu.cn*

*2 Department of Chemistry, Capital Normal University, Beijing, 100048*

## Experimental Section

### Materials

Trypsin,  $\alpha$ -casein,  $\beta$ -casein, acetonitrile (ACN), and methanol were purchased from Sigma-Aldrich. 2,5-dihydroxybenzoic acid (DHB) and 3-aminopropyl triethoxysilane (APTES) were purchased from J&K Scientific Ltd. Ammonium bicarbonate ( $\text{NH}_4\text{HCO}_3$ ) was purchased from Fluka. Ethanol and phosphoric acid ( $\text{H}_3\text{PO}_4$ ) were from Beijing Chemical Works. Formic acid (FA) and hydrazine hydrate were from Sinopharm Chemical Reagent Co., Ltd. Tetraethyl orthosilicate (TEOS) was purchased from Xilong Chemical Co., Ltd. Methyl acrylate was from Beijing Yili Fine Chemicals Co., Ltd. Toluene and ammonia solution ( $\text{NH}_3 \cdot \text{H}_2\text{O}$ ) were from Beijing Tong Guang Fine Chemicals Company. Non-fat milk was purchased from a local supermarket. Water used for digestion and enrichment analysis was from Wahaha Group Co., Ltd. All chemicals were of analytical grade except ACN and methanol, which were of HPLC grade.

### Preparation of hydrazone functionalized monodispersed silica microsphere (HFMSM)

#### Synthesis of monodispersed silica microsphere (MSM)

100 mL ethanol, 8 mL  $\text{NH}_3 \cdot \text{H}_2\text{O}$ , and 4 mL TEOS were mixed in a 250 mL flask and stirred for 12 h at room temperature. After washing by ethanol for 5 times, the product was

dried at 40 °C overnight.

#### Synthesis of amino functionalized monodispersed silica microsphere (AFMSM)

0.4 g MSM was dispersed in 20 mL toluene. The mixture was heated to 65 °C, and 0.44 g APTES was added. Then the mixture was heated and refluxed at 120 °C for 2 h. After cooling to room temperature, the product was washed by ethanol and dried at 40 °C overnight.

#### Synthesis of HFMSM

0.3 g AFMSM was added to 7 mL methanol in a 25 mL flask. The mixture was sonicated for a while for better dispersion, and cooled in an ice-water bath. Then 210 µL methyl acrylate in 5.25 mL methanol was added dropwise. The mixture was stirred in ice-water bath for 15 min, and then stirred at room temperature for another 24 h.

After washing and drying, 0.25 g of the obtained product was mixed with 7.5 mL methanol by sonication. Another solution containing 600 µL hydrazine hydrate and 7.5 mL methanol was added dropwise under stirring at room temperature, and then the mixture was refluxed at 120 °C for 3 h. Finally the product was collected by centrifugation, washed by ethanol and then dried at 40 °C overnight.

#### **Enrichment of phosphopeptides**

In typical experiments, the peptides in tryptic digest were diluted to a certain concentration by loading buffers (ACN/H<sub>2</sub>O 3:2, v/v, with varied concentration of FA). 50 µL HFMSM suspension (typically 8 mg mL<sup>-1</sup>) were added into 200 µL diluted peptides solution, and the mixture was gently vibrated for 30 min. The adsorbent could be easily centrifuged at 10000 rpm for 2 min (Eppendorf centrifuge 5417R). After removal of the supernatant and being washed with loading buffers for 3 time, HFMSM with phosphopeptides adsorbed was dispersed in 4 µL matrix solution (20 mg/mL DHB, 5% H<sub>3</sub>PO<sub>4</sub>, ACN/H<sub>2</sub>O 1:1, v/v) or buffers containing higher concentration of FA for phosphopeptide release. After centrifugation the supernatant was subjected to MALDI-ToF-MS analysis.

#### **Instrumentation**

For characterization of synthesized materials, transmission electron microscopy (TEM) images were acquired by FEI Tecnai G2 T20 TEM operated at 120 kV, scanning electron

microscopy (SEM) images were acquired by Hitachi S-4800 FESEM operated at 2 kV, infrared spectra (IR) were measured with KBr pellet by Bruker Tensor 27 FT-IR, and elemental composition analyses were performed using Vario Micro Cube Elemental Analyzer.

MALDI-ToF-MS spectra were obtained by a Bruker Daltonics ultraflex ToF mass spectrometer in reflection mode with following parameters: ion source 1, 25.00 kV; ion source 2, 22.15 kV; lens, 10.55 kV; reflector, 26.30 kV; reflector 2, 14.10 kV. The laser frequency was set on 20 Hz. For phosphopeptides eluted by matrix buffers, 1  $\mu$ L elute was directly deposited and dried on a target plate, while for phosphopeptides eluted by FA solution, 1  $\mu$ L elute was mixed with 0.5  $\mu$ L matrix solution on plate and dried before MALDI-ToF-MS analysis.

## Figure and Table

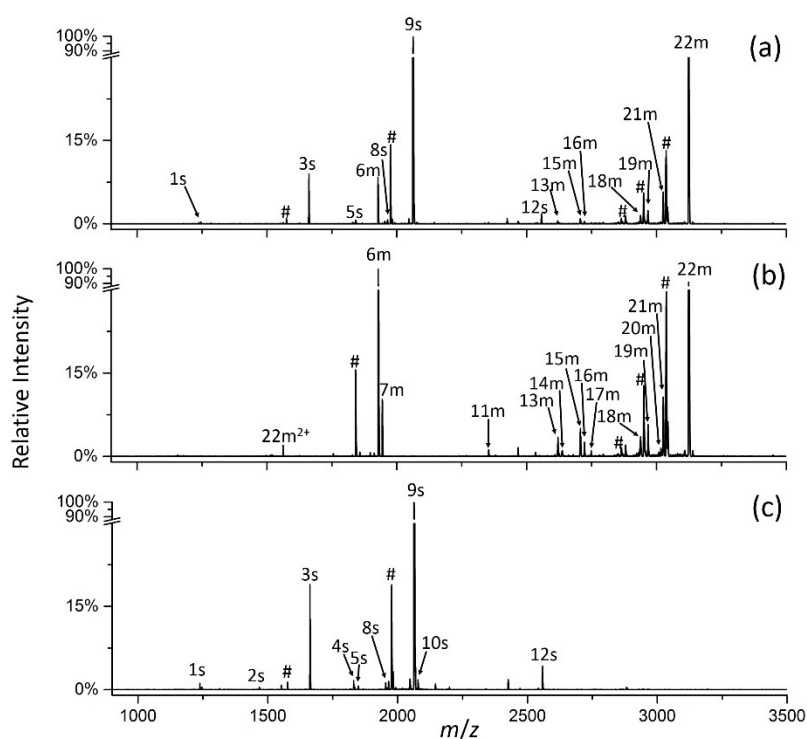

Figure S1 MALDI-ToF-MS spectra of digest of nonfat milk. (a) Global analysis of both mono- and multi-phosphopeptides; (b) Selective analysis of multiphosphopeptides; (c) Selective analysis of monophosphopeptides. Monophosphopeptides were marked with “s”; multiphosphopeptides were marked with “m”; “#” denoted dephosphorylated fragments.

Table S1 Phosphopeptides identified in digest of standard phosphoproteins

| No. | <i>m/z</i> | Numbers of phosphorylation sites | Sequence                      |
|-----|------------|----------------------------------|-------------------------------|
| β1  | 2061.8     | 1                                | FQpSEEQQQTEDELQDK             |
| β2  | 2431.0     | 1                                | IEKFQpSEEQQQTEDELQDK          |
| β3  | 2556.4     | 1                                | FQpSEEQQQTEDELQDKIHFP         |
| β4  | 2966.2     | 4                                | ELEELNVPGEIVEpSLpSpSpSEESITR  |
| β5  | 3122.3     | 4                                | RELEELNVPGEIVEpSLpSpSpSEESITR |
| α1  | 1237.3     | 1                                | TVDMEpSTEVF                   |
| α2  | 1253.3     | 1                                | TVDoMEpSTEVF                  |
| α3  | 1466.6     | 1                                | TVDMEpSTEVFTK                 |
| α4  | 1482.6     | 1                                | TVDoMEpSTEVFTK                |
| α5  | 1660.8     | 1                                | VPQLEIVPnSAEER                |

|             |        |   |                                 |
|-------------|--------|---|---------------------------------|
| $\alpha 6$  | 1833.1 | 1 | YLGEYLIVPNpSAEER                |
| $\alpha 7$  | 1847.7 | 1 | DIGpSESTEDQAMEDIK               |
| $\alpha 8$  | 1927.7 | 2 | DIGpSEpSTEDQAMEDIK              |
| $\alpha 9$  | 1943.7 | 2 | DIGpSEpSTEDQAoMEDIK             |
| $\alpha 10$ | 1952.0 | 1 | YKVPQLEIVPNpSAEER               |
| $\alpha 11$ | 2618.9 | 4 | NTMEHVpSpSpSEEpSIISQETYK        |
| $\alpha 12$ | 2634.9 | 4 | NToMEHVpSpSpSEEpSIISQETYK       |
| $\alpha 13$ | 2678.0 | 3 | VNELpSKDIGpSEpSTEDQAMEDIK       |
| $\alpha 14$ | 2704.9 | 5 | pyro-QMEAEpSIpSpSpSEEIVPNpSVEQK |
| $\alpha 15$ | 2720.9 | 5 | QMEAEpSIpSpSpSEEIVPNpSVEQK      |
| $\alpha 16$ | 2736.9 | 5 | QoMEAEpSIpSpSpSEEIVPNpSVEQK     |
| $\alpha 17$ | 2747.0 | 4 | KNTMEHVpSpSpSEEpSIISQETYK       |
| $\alpha 18$ | 2935.2 | 3 | EKVNELpSKDIGpSEpSTEDQAMEDIK     |
| $\alpha 19$ | 3008.0 | 4 | NANEEEEYSIGpSpSpSEEpSAEVATEEVK  |
| $\alpha 20$ |        |   | NANEEEEYpSIGpSpSpSEEpSAEVATEEV  |
|             | 3088.0 | 5 | K                               |

Table S2 Phosphopeptides identified in digest of standard phosphoproteins

| No. | <i>m/z</i> | Numbers of phosphorylation sites | Sequence                        | Proteins            |
|-----|------------|----------------------------------|---------------------------------|---------------------|
| 1s  | 1237.3     | 1                                | TVDMEpSTEVF                     | $\alpha$ -S2-casein |
| 2s  | 1466.6     | 1                                | TVDMEpSTEVFTK                   | $\alpha$ -S2-casein |
| 3s  | 1660.8     | 1                                | VPQLEIVPNpSAEER                 | $\alpha$ -S1-casein |
| 4s  | 1833.1     | 1                                | YLGEYLIVPNpSAEER                | $\alpha$ -S1-casein |
| 5s  | 1847.7     | 1                                | DIGpSESTEDQAMEDIK               | $\alpha$ -S1-casein |
| 6m  | 1927.7     | 2                                | DIGpSEpSTEDQAMEDIK              | $\alpha$ -S1-casein |
| 7m  | 1943.7     | 2                                | DIGpSEpSTEDQAoMEDIK             | $\alpha$ -S1-casein |
| 8s  | 1952.0     | 1                                | YKVPQLEIVPNpSAEER               | $\alpha$ -S1-casein |
| 9s  | 2061.8     | 1                                | FQpSEEQQQTEDELQDK               | $\beta$ -casein     |
| 10s | 2080.1     | 1                                | KYKVPQLEIVPNpSAEER              | $\alpha$ -S1-casein |
| 11m | 2352.6     | 4                                | NVPGEIVEpSLpSpSpSEESITR         | $\beta$ -casein     |
| 12s | 2556.4     | 1                                | FQpSEEQQQTEDELQDKIHPF           | $\beta$ -casein     |
| 13m | 2618.9     | 4                                | NTMEHVpSpSpSEEpSIISQETYK        | $\alpha$ -S2-casein |
| 14m | 2634.9     | 4                                | NToMEHVpSpSpSEEpSIISQETYK       | $\alpha$ -S2-casein |
| 15m | 2704.9     | 5                                | pyro-QMEAEpSIpSpSpSEEIVPNpSVEQK | $\alpha$ -S1-casein |
| 16m | 2720.9     | 5                                | QMEAEpSIpSpSpSEEIVPNpSVEQK      | $\alpha$ -S1-casein |
| 17m | 2747.0     | 4                                | KNTMEHVpSpSpSEEpSIISQETYK       | $\alpha$ -S2-casein |

---

|     |        |   |                               |                     |
|-----|--------|---|-------------------------------|---------------------|
| 18m | 2935.2 | 3 | EKVNELpSKDIGpSEpSTEDQAMEDIK   | $\alpha$ -S1-casein |
| 19m | 2966.2 | 4 | ELEELNVPGEIVEpSLpSpSpSEESITR  | $\beta$ -casein     |
| 20m | 3008.0 | 4 | NANEEYSIGpSpSpSEEpSAEVATEEVK  | $\alpha$ -S2-casein |
| 21m | 3025.5 | 2 | FPQpYLQpYLYQGPIVLNPWDQ VKR    | $\alpha$ -S2-casein |
| 22m | 3122.3 | 4 | RELEELNVPGEIVEpSLpSpSpSEESITR | $\beta$ -casein     |

---
